# Supplementary material for: Solubilization of skin collagen improves the accuracy and reliability of stable isotope measurements
Source: PeerJ. 2025 Oct 8;13:e20152. doi: 10.7717/peerj.20152 (PMC12514997; doi:10.7717/peerj.20152)
Supplement: Supplemental Information 4 [file peerj-13-20152-s004.xlsx]

## Sheet: Sheet1
Sample ID	Pig	Treatment	Material	Initial Sample Mass (mg)	Post Lipid Extraction Mass (mg)	Collagen Mass (mg)	% Collagen	Aliquot Mass (mg)	δ13CVPDB (‰)	δ15NAIR (‰)	wt% C	wt% N	C:Natomic
26769	1	65/LE	Collagen	56.4	38.1	26.8	70.3412	0.589	-15.44	4.87	40	14.4	3.23
26770	1	65/LE	Collagen	48.5	34.9	23.4	67.0487	0.562	-15.48	4.91	41	14.9	3.22
26771	1	65/LE	Collagen	47.8	32.1	24.1	75.0779	0.591	-15.38	4.85	40.5	14.6	3.23
26772	1	65/LE	Collagen	47.5	33.4	24.5	73.3533	0.578	-15.38	4.81	40.9	14.7	3.23
26773	1	65/LE	Collagen	45.3	32.6	23.6	72.3926	0.57	-15.42	4.45	40.8	14.6	3.25
26786	1	65/LE	Collagen	72.4	51.5	33.6	65.2427	0.584	-15.34	4.62	41.2	14.9	3.23
26787	1	65/LE	Collagen	124.5	71.2	42	58.9888	0.531	-15.14	4.51	41.1	15.1	3.18
26788	1	65/LE	Collagen	114.6	67.2	38.8	57.7381	0.537	-15.18	4.58	40.8	15.1	3.15
26789	1	65/LE	Collagen	91.4	69.8	38.8	55.5874	0.597	-15.16	4.66	41	15.1	3.17
26790	1	65/LE	Collagen	89.2	66.2	36.5	55.136	0.582	-15.18	4.77	41	15.1	3.17
27040	1	65/LE	Insoluble Residue	/	/	/	/	0.522	-17.92	4.19	52.6	10.4	5.92
27041	1	65/LE	Insoluble Residue	/	/	/	/	0.58	-18.13	3.92	56.5	8.7	7.59
27042	1	65/LE	Insoluble Residue	/	/	/	/	0.52	-18.01	3.88	56.4	8.3	7.94
27043	1	65/LE	Insoluble Residue	/	/	/	/	0.524	-18.09	3.89	59	8.6	8
27044	1	65/LE	Insoluble Residue	/	/	/	/	0.58	-18.17	3.79	56.9	7.8	8.52
27055	1	65/LE	Insoluble Residue	/	/	/	/	0.519	-17.95	3.42	55.5	9.1	7.11
27056	1	65/LE	Insoluble Residue	/	/	/	/	0.528	-17.46	4.23	49.5	11.6	4.96
27057	1	65/LE	Insoluble Residue	/	/	/	/	0.568	-17.74	4.2	54.1	9.9	6.39
27058	1	65/LE	Insoluble Residue	/	/	/	/	0.547	-17.79	3.86	54.5	9.6	6.64
27059	1	65/LE	Insoluble Residue	/	/	/	/	0.553	-17.6	3.81	53.4	10.5	5.93
26774	2	65/LE	Collagen	132.8	102.9	46.4	45.0923	0.576	-15.97	4.61	41.3	14.85	3.25
26775	2	65/LE	Collagen	154.2	105.6	41	38.8258	0.588	-15.92	4.74	40.4	14.9	3.16
26776	2	65/LE	Collagen	131.8	95.4	32.8	34.3816	0.601	-16.17	5.03	40.3	14.8	3.18
26777	2	65/LE	Collagen	116.4	76.2	35.6	46.7192	0.527	-16.05	4.68	40.6	15	3.15
26778	2	65/LE	Collagen	172.7	115.6	31.7	27.4221	0.609	-16.11	4.85	40.5	14.6	3.24
26791	2	65/LE	Collagen	131	86.5	35.8	41.3873	0.558	-16.01	4.64	40.5	15	3.14
26792	2	65/LE	Collagen	201.4	120.2	49.9	41.5141	0.543	-15.7	4.1	40.8	15.1	3.15
26793	2	65/LE	Collagen	164.4	94.3	42.9	45.4931	0.508	-15.77	4.01	40.5	15	3.15
26794	2	65/LE	Collagen	161.6	110.3	32.5	29.4651	0.517	-16.04	4.52	40.35	14.8	3.18
26795	2	65/LE	Collagen	203.9	131.3	40.1	30.5407	0.526	-15.95	4.43	41	14.9	3.21
27045	2	65/LE	Insoluble Residue	/	/	/	/	0.534	-18.25	3.43	55	9.2	6.96
27046	2	65/LE	Insoluble Residue	/	/	/	/	0.505	-17.76	3.86	49.3	11.9	4.85
27047	2	65/LE	Insoluble Residue	/	/	/	/	0.595	-17.04	4.57	44.4	14.1	3.67
27048	2	65/LE	Insoluble Residue	/	/	/	/	0.545	-17.39	4.25	47.9	12.8	4.37
27049	2	65/LE	Insoluble Residue	/	/	/	/	0.511	-17.08	4.72	44.4	14.3	3.61
27060	2	65/LE	Insoluble Residue	/	/	/	/	0.579	-17.85	4.11	48.1	12.6	4.47
27061	2	65/LE	Insoluble Residue	/	/	/	/	0.591	-18.31	3.09	60.4	7.3	9.66
27062	2	65/LE	Insoluble Residue	/	/	/	/	0.614	-17.74	4.1	51.2	11.7	5.08
27063	2	65/LE	Insoluble Residue	/	/	/	/	0.54	-18.12	3.37	56.5	8.6	7.71
27064	2	65/LE	Insoluble Residue	/	/	/	/	0.525	-17.91	3.64	52.9	10.7	5.77
26779	3	65/LE	Collagen	152.9	95.7	54.3	56.7398	0.596	-15.75	4.66	41.2	15.2	3.15
26780	3	65/LE	Collagen	120.2	71.7	41.9	58.4379	0.591	-15.89	4.78	40.5	14.9	3.17
26781	3	65/LE	Collagen	129.7	87.4	48	54.9199	0.534	-15.79	4.58	40.85	15.15	3.15
26782	3	65/LE	Collagen	104.5	69.6	35.2	50.5747	0.572	-15.8	4.34	41.2	15.1	3.18
26783	3	65/LE	Collagen	164.9	100.7	46	45.6802	0.579	-15.75	4.33	40.7	14.9	3.18
26796	3	65/LE	Collagen	172	96.2	45.9	47.7131	0.558	-16.01	4.64	40.5	15	3.14
26797	3	65/LE	Collagen	208.9	130.7	39.1	29.9158	0.543	-15.7	4.1	40.8	15.1	3.15
26798	3	65/LE	Collagen	184.1	115.1	44.3	38.4883	0.508	-15.77	4.01	40.5	15	3.15
26799	3	65/LE	Collagen	131.8	91.1	45.9	50.3842	0.517	-16.04	4.52	41.2	14.9	3.21
26800	3	65/LE	Collagen	121.2	70.2	38.4	54.7009	0.52	-16	4.48	40.25	14.8	3.18
27050	3	65/LE	Insoluble Residue	/	/	/	/	0.532	-18.01	3.83	54.1	10.1	6.27
27051	3	65/LE	Insoluble Residue	/	/	/	/	0.572	-18.2	4.12	54.7	9.4	6.78
27052	3	65/LE	Insoluble Residue	/	/	/	/	0.555	-18.64	3.4	63.4	5.8	12.74
27053	3	65/LE	Insoluble Residue	/	/	/	/	0.607	-18.33	4.2	58.7	8.4	8.13
27054	3	65/LE	Insoluble Residue	/	/	/	/	0.526	-18.79	3.36	63.2	5.8	12.62
27065	3	65/LE	Insoluble Residue	/	/	/	/	0.505	-18.2	3.37	58.2	8.3	8.19
27066	3	65/LE	Insoluble Residue	/	/	/	/	0.523	-17.79	3.71	46.6	10.6	5.14
27067	3	65/LE	Insoluble Residue	/	/	/	/	0.559	-18.19	4.06	56	9.3	7.03
27068	3	65/LE	Insoluble Residue	/	/	/	/	0.553	-18.75	3.39	65.8	5.8	13.12
27069	3	65/LE	Insoluble Residue	/	/	/	/	0.574	-18.36	3.6	58.5	8.3	8.23
34986	1	62/LE	Collagen	145.3	74.6	37.4	50.134	0.59	-15.05	4.82	45.64	16.88	3.15
34987	1	62/LE	Collagen	243.9	102.4	40.9	39.9414	0.534	-15.17	4.74	44.97	16.71	3.14
34988	1	62/LE	Collagen	175	92.3	41.4	44.8537	0.551	-15.05	4.73	45.85	17.13	3.12
34989	1	62/LE	Collagen	214.6	108.7	45.4	41.7663	0.543	-15.05	4.92	46.44	17.29	3.13
34990	1	62/LE	Collagen	352.5	144.9	55.8	38.5093	0.519	-14.82	4.39	46.62	17.36	3.13
34991	1	62/LE	Collagen	262.5	124.9	53	42.4339	0.506	-14.93	4.37	46.53	17.38	3.12
34992	1	62/LE	Collagen	175.5	92	48.5	52.7174	0.511	-14.94	4.73	46.2	17.28	3.12
34993	1	62/LE	Collagen	181.2	104.8	48.5	46.2786	0.559	-15.17	4.77	46.48	17.32	3.13
34994	1	62/LE	Collagen	216.6	115.4	47.5	41.1612	0.546	-15.21	4.79	46.25	17.27	3.13
34995	1	62/LE	Collagen	226.8	99.4	44.5	44.7686	0.521	-14.94	4.59	45.97	17.2	3.12
35071	1	62/LE	Insoluble Residue	/	/	/	/	0.574	-17.57	4.61	53.71	11.63	5.38
35072	1	62/LE	Insoluble Residue	/	/	/	/	0.53	-16.7	4.62	48.82	14.72	3.87
35073	1	62/LE	Insoluble Residue	/	/	/	/	0.542	-17.41	4.32	53.09	12.53	4.94
35074	1	62/LE	Insoluble Residue	/	/	/	/	0.582	-16.64	4.8	48.84	14.89	3.83
35075	1	62/LE	Insoluble Residue	/	/	/	/	0.595	-17.63	4.67	58.76	10.99	6.23
35076	1	62/LE	Insoluble Residue	/	/	/	/	0.523	-16.37	4.08	43.68	12.94	3.94
35077	1	62/LE	Insoluble Residue	/	/	/	/	0.569	-17.81	4.64	57.36	10.32	6.48
35078	1	62/LE	Insoluble Residue	/	/	/	/	0.515	-16.99	4.49	51.25	13.57	4.4
35079	1	62/LE	Insoluble Residue	/	/	/	/	0.599	-16.81	4.49	51.44	13.78	4.35
35080	1	62/LE	Insoluble Residue	/	/	/	/	0.558	-17.63	4.36	56.67	10.53	6.28
34996	2	62/LE	Collagen	273.2	97.6	51.2	52.459	0.564	-15.68	4.63	47.08	17.61	3.12
34997	2	62/LE	Collagen	355.2	107.3	48.4	45.1072	0.528	-16.02	4.51	45.58	17.08	3.11
34998	2	62/LE	Collagen	352	107.7	46.2	42.8969	0.515	-15.7	4.56	45.79	17.18	3.11
34999	2	62/LE	Collagen	284.1	94.9	42.4	44.6786	0.57	-15.83	4.47	46.45	17.28	3.14
35000	2	62/LE	Collagen	308.4	108.4	46.2	42.6199	0.521	-15.82	4.61	46.26	17.21	3.13
35001	2	62/LE	Collagen	132.6	56.6	35.9	63.4276	0.516	-15.88	4.77	46.35	17.22	3.14
35002	2	62/LE	Collagen	283.8	80.9	44.4	54.8826	0.515	-15.61	4.27	45.32	16.87	3.13
35003	2	62/LE	Collagen	226.3	92.9	41.1	44.2411	0.54	-15.6	4.12	45.44	16.91	3.14
35004	2	62/LE	Collagen	119.1	49.6	30.8	62.0968	0.551	-15.83	4.42	44.12	16.33	3.15
35005	2	62/LE	Collagen	364.9	136	51.6	37.9412	0.521	-15.73	4.48	43.86	16.35	3.13
35081	2	62/LE	Insoluble Residue	/	/	/	/	0.516	-17.18	4.98	49.55	15.66	3.69
35082	2	62/LE	Insoluble Residue	/	/	/	/	0.538	-17.06	4.51	47.96	15.07	3.71
35083	2	62/LE	Insoluble Residue	/	/	/	/	0.595	-17.39	4.42	56.07	12.03	5.44
35084	2	62/LE	Insoluble Residue	/	/	/	/	0.535	-16.95	4.46	48.63	15.26	3.72
35085	2	62/LE	Insoluble Residue	/	/	/	/	0.565	-17.05	4.78	49.86	15.07	3.86
35086	2	62/LE	Insoluble Residue	/	/	/	/	0.53	-17.57	4.83	47.73	15.09	3.69
35087	2	62/LE	Insoluble Residue	/	/	/	/	0.583	-17.39	4.38	53.43	13.2	4.72
35088	2	62/LE	Insoluble Residue	/	/	/	/	0.521	-17.7	4.27	55.07	11.95	5.37
35089	2	62/LE	Insoluble Residue	/	/	/	/	0.529	-17.83	4.38	50.46	13.4	4.39
35090	2	62/LE	Insoluble Residue	/	/	/	/	0.586	-17.37	4.12	53.73	13.48	4.65
35006	3	62/LE	Collagen	166.3	97.3	42.4	43.5766	0.512	-15.93	4.49	44.91	16.36	3.2
35007	3	62/LE	Collagen	231.2	132.4	50.8	38.3686	0.591	-15.85	4.56	44.59	16.31	3.19
35008	3	62/LE	Collagen	117.9	56.1	36.2	64.5276	0.526	-15.72	4.51	44.13	16.4	3.14
35009	3	62/LE	Collagen	110.7	56.9	36.8	64.6749	0.599	-15.97	4.73	44.4	16.49	3.14
35010	3	62/LE	Collagen	158.9	98.7	46.5	47.1125	0.537	-15.93	4.66	46.23	16	3.37
35011	3	62/LE	Collagen	112.2	66.7	41	61.4693	0.59	-15.82	4.83	45.89	17.04	3.14
35012	3	62/LE	Collagen	143.3	87.1	44.7	51.3203	0.582	-15.69	4.6	44.37	16.53	3.13
35013	3	62/LE	Collagen	183.2	94.2	44.9	47.6645	0.555	-15.9	4.76	45.65	17.02	3.13
35014	3	62/LE	Collagen	146.7	75.5	40.8	54.0397	0.55	-15.77	4.87	44.76	16.72	3.12
35015	3	62/LE	Collagen	210.4	134.1	49.5	36.9128	0.53	-15.94	4.88	46.14	16.23	3.32
35091	3	62/LE	Insoluble Residue	/	/	/	/	0.548	-17.69	4.3	53.73	12.24	5.12
35092	3	62/LE	Insoluble Residue	/	/	/	/	0.56	-17.89	4.2	59.39	10.1	6.85
35093	3	62/LE	Insoluble Residue	/	/	/	/	0.592	-17.81	4.01	51.08	12.67	4.7
35094	3	62/LE	Insoluble Residue	/	/	/	/	0.556	-18.05	3.68	52.42	7.14	8.56
35095	3	62/LE	Insoluble Residue	/	/	/	/	0.575	-17.93	4.34	56.36	11.26	5.84
35096	3	62/LE	Insoluble Residue	/	/	/	/	0.578	-18.36	4.3	56.54	10.01	6.59
35097	3	62/LE	Insoluble Residue	/	/	/	/	0.596	-18.36	4.22	61.54	8.21	8.74
35098	3	62/LE	Insoluble Residue	/	/	/	/	0.568	-18.15	3.94	59.51	9.25	7.51
35099	3	62/LE	Insoluble Residue	/	/	/	/	0.518	-17.64	3.99	51.11	13.68	4.36
35100	3	62/LE	Insoluble Residue	/	/	/	/	0.584	-17.3	4.36	51.48	14.12	4.25
35878	1	58/LE	Collagen	95.7	66	30.7	46.5152	0.514	-15.15	4.83	45.46	16.8	3.16
35879	1	58/LE	Collagen	153.6	55.5	31.1	56.036	0.526	-15.04	4.63	47.13	17.41	3.16
35880	1	58/LE	Collagen	229.5	84.9	40.6	47.821	0.565	-14.84	4.54	47.08	17.39	3.16
35881	1	58/LE	Collagen	110.2	58.4	32.6	55.8219	0.526	-15.23	4.96	46.16	17.09	3.15
35882	1	58/LE	Collagen	161.4	96.7	35.5	36.7115	0.52	-15.09	4.69	47.12	17.36	3.17
35883	1	58/LE	Collagen	131.8	82.8	36.4	43.9614	0.553	-15.14	4.23	46.5	17.02	3.19
35884	1	58/LE	Collagen	195.7	65.6	34	51.8293	0.595	-14.95	4.32	46.24	17.1	3.15
35885	1	58/LE	Collagen	168.9	90.5	33.1	36.5746	0.531	-15.15	5.09	45.53	16.89	3.14
35886	1	58/LE	Collagen	168.6	76.8	36.9	48.0469	0.556	-14.98	4.74	46.72	17.34	3.14
35887	1	58/LE	Collagen	230.9	102	33	32.3529	0.604	-15.13	5.05	46.37	16.97	3.19
36007	1	58/LE	Insoluble Residue	/	/	/	/	0.501	-16.57	4.81	48.9	14.74	3.87
36008	1	58/LE	Insoluble Residue	/	/	/	/	0.586	-17.02	4.56	50.89	13.66	4.35
36009	1	58/LE	Insoluble Residue	/	/	/	/	0.562	-17.46	4.46	55.48	11.65	5.56
36010	1	58/LE	Insoluble Residue	/	/	/	/	0.504	-17.03	4.51	50.88	13.45	4.41
36011	1	58/LE	Insoluble Residue	/	/	/	/	0.642	-16.51	4.95	51.17	14.06	4.24
36012	1	58/LE	Insoluble Residue	/	/	/	/	0.514	-16.31	4.52	48.78	15.99	3.56
36013	1	58/LE	Insoluble Residue	/	/	/	/	0.633	-16.78	4.78	51.65	14.5	4.15
36014	1	58/LE	Insoluble Residue	/	/	/	/	0.608	-16.57	4.86	50.08	14.7	3.97
36015	1	58/LE	Insoluble Residue	/	/	/	/	0.436	-16.57	4.46	49.41	15.29	3.77
36016	1	58/LE	Insoluble Residue	/	/	/	/	0.49	-16.78	4.83	53.38	14.22	4.38
35893	2	58/LE	Collagen	187.3	101	22.6	22.3762	0.518	-16.16	5.32	45.31	16.76	3.15
35894	2	58/LE	Collagen	210.7	86.2	35.8	41.5313	0.516	-15.77	4.75	46.69	17.34	3.14
35895	2	58/LE	Collagen	219.5	138.9	28.3	20.3744	0.538	-15.98	5.08	45.22	16.67	3.17
35896	2	58/LE	Collagen	229.1	147.5	34.9	23.661	0.546	-15.95	4.88	45.55	16.76	3.17
35897	2	58/LE	Collagen	48.9	25.4	17.6	69.2913	0.541	-15.96	4.85	44.06	16.18	3.18
35898	2	58/LE	Collagen	216.2	144.8	37.7	26.0359	0.531	-15.65	4.83	46.08	17.05	3.15
35899	2	58/LE	Collagen	302.5	184	49.6	26.9565	0.577	-15.57	4.72	46.55	17.2	3.16
35900	2	58/LE	Collagen	183.4	119.5	31.6	26.4435	0.524	-15.96	4.64	46.5	16.66	3.26
35901	2	58/LE	Collagen	173.3	119.2	39.4	33.0537	0.547	-15.7	4.57	45.85	16.84	3.17
35902	2	58/LE	Collagen	192.5	125.6	23.9	19.0287	0.532	-15.98	5.11	44.26	16.22	3.18
36022	2	58/LE	Insoluble Residue	/	/	/	/	0.614	-16.72	4.79	49.64	15.81	3.66
36023	2	58/LE	Insoluble Residue	/	/	/	/	0.588	-16.55	4.23	48.75	16.43	3.46
36024	2	58/LE	Insoluble Residue	/	/	/	/	0.488	-17.04	4.74	49.39	15.74	3.66
36025	2	58/LE	Insoluble Residue	/	/	/	/	0.491	-16.62	4.56	48.73	16.28	3.49
36026	2	58/LE	Insoluble Residue	/	/	/	/	0.471	-17.75	4.27	47.42	14.44	3.83
36027	2	58/LE	Insoluble Residue	/	/	/	/	0.489	-16.99	4.41	51.74	14.16	4.26
36028	2	58/LE	Insoluble Residue	/	/	/	/	0.634	-16.25	4.35	48.73	16.71	3.4
36029	2	58/LE	Insoluble Residue	/	/	/	/	0.565	-16.74	4.29	49.35	16.14	3.57
36030	2	58/LE	Insoluble Residue	/	/	/	/	0.622	-17.17	4.06	53.59	13.45	4.65
36031	2	58/LE	Insoluble Residue	/	/	/	/	0.612	-17.03	4.26	51.59	15.03	4
35908	3	58/LE	Collagen	173.3	63.9	33.9	53.0516	0.519	-15.8	4.57	45.28	16.54	3.19
35909	3	58/LE	Collagen	197.6	81.2	39.1	48.1527	0.502	-15.55	4.43	46.65	17.32	3.14
35910	3	58/LE	Collagen	160.6	68.6	34.3	50	0.512	-15.56	4.67	46.03	17.07	3.14
35911	3	58/LE	Collagen	126.5	50.6	31.9	63.0435	0.551	-15.7	4.53	46.78	17.43	3.13
35912	3	58/LE	Collagen	146.1	66.4	35.2	53.012	0.566	-15.65	4.89	46.62	17.34	3.14
35913	3	58/LE	Collagen	175.3	78.7	41.4	52.6048	0.56	-15.7	4.76	47.04	17.41	3.15
35914	3	58/LE	Collagen	143.2	59.7	35.2	58.9615	0.556	-15.74	4.71	46.28	17.27	3.13
35915	3	58/LE	Collagen	179.8	66.2	35.3	53.3233	0.521	-16	4.94	47.02	16.84	3.26
35916	3	58/LE	Collagen	89.6	38.4	27.8	72.3958	0.591	-15.63	4.72	45.46	16.73	3.17
35917	3	58/LE	Collagen	86.7	32	22.6	70.625	0.515	-15.89	4.96	45.6	16.78	3.17
36037	3	58/LE	Insoluble Residue	/	/	/	/	0.571	-18.14	4.15	60.47	8.74	8.07
36038	3	58/LE	Insoluble Residue	/	/	/	/	0.471	-17.25	3.64	51.71	13.56	4.45
36039	3	58/LE	Insoluble Residue	/	/	/	/	0.478	-17.92	3.87	56.4	11.07	5.94
36040	3	58/LE	Insoluble Residue	/	/	/	/	0.587	-17.08	4.23	49.55	14.6	3.96
36041	3	58/LE	Insoluble Residue	/	/	/	/	0.63	-17.25	4.39	52.9	13.58	4.54
36042	3	58/LE	Insoluble Residue	/	/	/	/	0.58	-16.95	4.24	51.65	14.84	4.06
36043	3	58/LE	Insoluble Residue	/	/	/	/	0.501	-17.39	4.33	51.73	14.09	4.28
36044	3	58/LE	Insoluble Residue	/	/	/	/	0.511	-17.52	4.47	52.44	13.6	4.5
36045	3	58/LE	Insoluble Residue	/	/	/	/	0.513	-18.11	4.03	54.3	10.82	5.85
36046	3	58/LE	Insoluble Residue	/	/	/	/	0.528	-18.04	4.35	52.82	12.06	5.11
35888	1	62/LE*A	Collagen	102.9	66.8	27.5	41.1677	0.583	-15.12	4.68	46.33	17.02	3.17
35889	1	62/LE*A	Collagen	216.9	89.5	29.8	33.2961	0.597	-15.04	4.58	46.55	17.11	3.17
35890	1	62/LE*A	Collagen	212	110.1	32.3	29.337	0.534	-15.07	4.79	47.11	17.44	3.15
35891	1	62/LE*A	Collagen	255.3	170.6	37	21.6882	0.593	-15.11	4.93	44.22	16.29	3.17
35892	1	62/LE*A	Collagen	130.1	65.4	31.1	47.5535	0.543	-15.22	4.83	45.56	16.72	3.18
36017	1	62/LE*A	Insoluble Residue	/	/	/	/	0.518	-17.52	4.51	54.66	11.92	5.35
36018	1	62/LE*A	Insoluble Residue	/	/	/	/	0.572	-17.73	4.66	57.33	11.56	5.78
36019	1	62/LE*A	Insoluble Residue	/	/	/	/	0.583	-17.83	4.87	59.06	7.45	9.24
36020	1	62/LE*A	Insoluble Residue	/	/	/	/	0.508	-15.9	4.17	49.6	16.06	3.6
36021	1	62/LE*A	Insoluble Residue	/	/	/	/	0.611	-16.89	4.85	50.12	14.26	4.1
35903	2	62/LE*A	Collagen	141.5	89.3	22.6	25.308	0.55	-16.08	5.2	45.86	16.99	3.15
35904	2	62/LE*A	Collagen	118.3	79.7	32.1	40.276	0.565	-15.63	4.46	46.57	17.29	3.15
35905	2	62/LE*A	Collagen	186.6	119.3	31.3	26.2364	0.548	-15.76	4.87	45.04	16.68	3.15
35906	2	62/LE*A	Collagen	182	109.5	31.6	28.8584	0.584	-15.88	5.1	46.21	17.17	3.14
35907	2	62/LE*A	Collagen	93.2	59.9	27.9	46.5776	0.57	-16.07	4.6	44.86	16.56	3.16
36032	2	62/LE*A	Insoluble Residue	/	/	/	/	0.49	-17.39	4.45	51.93	14.21	4.26
36033	2	62/LE*A	Insoluble Residue	/	/	/	/	0.617	-16.97	4.47	49.17	15.52	3.69
36034	2	62/LE*A	Insoluble Residue	/	/	/	/	0.663	-16.47	4.84	49.18	17.11	3.35
36035	2	62/LE*A	Insoluble Residue	/	/	/	/	0.504	-17.2	4.25	50.93	14.69	4.04
36036	2	62/LE*A	Insoluble Residue	/	/	/	/	0.531	-17.66	4.26	51.67	13.86	4.35
35918	3	62/LE*A	Collagen	93.1	39.1	23.3	59.5908	0.547	-15.9	4.53	45.34	15.97	3.31
35919	3	62/LE*A	Collagen	156.1	56.6	33.4	59.0106	0.531	-16.11	4.24	47.91	15.98	3.5
35920	3	62/LE*A	Collagen	171.7	59.1	33.9	57.3604	0.546	-15.75	4.3	45.65	16.66	3.2
35921	3	62/LE*A	Collagen	113.1	37.2	23.7	63.7097	0.551	-16.19	4.2	46.71	15.49	3.52
35922	3	62/LE*A	Collagen	171.3	92.3	34.9	37.8115	0.553	-15.56	4.72	46.04	17.1	3.14
36047	3	62/LE*A	Insoluble Residue	/	/	/	/	0.539	-18.68	4.15	62.25	7.55	9.62
36048	3	62/LE*A	Insoluble Residue	/	/	/	/	0.503	-19	3.35	68.51	4.5	17.76
36049	3	62/LE*A	Insoluble Residue	/	/	/	/	0.585	-17.69	4.08	53.41	12.27	5.08
36050	3	62/LE*A	Insoluble Residue	/	/	/	/	0.656	-18.54	4.31	62.88	7.26	10.1
36051	3	62/LE*A	Insoluble Residue	/	/	/	/	0.484	-17.66	4.25	54.14	12.53	5.04
30151	1	0/LE	Skin	/	/	/	/	0.509	-15.79	4.68	44.12	15.13	3.4
30152	1	0/LE	Skin	/	/	/	/	0.554	-15.62	4.6	44.82	15.06	3.47
30153	1	0/LE	Skin	/	/	/	/	0.57	-16.66	4.74	47.13	13.41	4.1
30154	1	0/LE	Skin	/	/	/	/	0.565	-15.61	5.03	43.44	14.85	3.41
30155	1	0/LE	Skin	/	/	/	/	0.575	-15.71	4.96	44.01	14.93	3.44
30156	1	0/LE	Skin	/	/	/	/	0.543	-15.95	4.98	46	14.39	3.73
30157	1	0/LE	Skin	/	/	/	/	0.53	-15.97	4.98	47.83	14.11	3.95
30158	1	0/LE	Skin	/	/	/	/	0.585	-15.74	4.89	44.16	14.98	3.44
30159	1	0/LE	Skin	/	/	/	/	0.538	-15.84	4.92	45.32	14.79	3.57
30160	1	0/LE	Skin	/	/	/	/	0.504	-15.97	5	47.02	14.22	3.86
30162	2	0/LE	Skin	/	/	/	/	0.583	-16.73	4.89	46.99	14.26	3.84
30163	2	0/LE	Skin	/	/	/	/	0.546	-16.47	4.83	44.24	15.05	3.43
30164	2	0/LE	Skin	/	/	/	/	0.525	-16.61	4.74	43.71	14.84	3.44
30165	2	0/LE	Skin	/	/	/	/	0.515	-16.51	4.71	45.26	14.81	3.56
30166	2	0/LE	Skin	/	/	/	/	0.518	-16.66	4.96	44.02	15.01	3.42
30167	2	0/LE	Skin	/	/	/	/	0.527	-16.34	4.06	47.6	14.08	3.94
30168	2	0/LE	Skin	/	/	/	/	0.546	-17.07	4.13	52.14	11.26	5.4
30169	2	0/LE	Skin	/	/	/	/	0.541	-16.51	4.23	47.21	13.84	3.98
30170	2	0/LE	Skin	/	/	/	/	0.524	-20.12	4.41	46.94	12.99	4.21
30171	2	0/LE	Skin	/	/	/	/	0.579	-16.89	4.35	50.63	12.6	4.69
30173	3	0/LE	Skin	/	/	/	/	0.519	-16.35	4.47	42.77	14.93	3.34
30174	3	0/LE	Skin	/	/	/	/	0.565	-16.66	4.59	45.52	13.57	3.91
30175	3	0/LE	Skin	/	/	/	/	0.539	-16.46	4.67	47.11	14.35	3.83
30176	3	0/LE	Skin	/	/	/	/	0.56	-16.27	4.85	44.49	15.02	3.45
30177	3	0/LE	Skin	/	/	/	/	0.554	-16.5	4.56	45.13	14.28	3.69
30178	3	0/LE	Skin	/	/	/	/	0.571	-17.44	4.38	54.6	10.15	6.27
30179	3	0/LE	Skin	/	/	/	/	0.545	-16.2	4.44	46.43	14.48	3.74
30180	3	0/LE	Skin	/	/	/	/	0.541	-16.66	4.53	48.4	13.61	4.15
30181	3	0/LE	Skin	/	/	/	/	0.527	-16.46	5.01	47	14.35	3.82
30182	3	0/LE	Skin	/	/	/	/	0.564	-17.21	4.45	53.95	10.92	5.76
35517	1	0/0	Skin	/	/	/	/	0.534	-16.52	4.67	53.64	12.1	5.17
35518	1	0/0	Skin	/	/	/	/	0.513	-17.36	4.28	59.94	8.74	7.99
35519	1	0/0	Skin	/	/	/	/	0.548	-17.75	5	61.32	7.94	9
35520	1	0/0	Skin	/	/	/	/	0.577	-16.27	4.57	52	13.09	4.63
40344	1	0/0	Skin	/	/	/	/	0.4706	-16.94	3.83	55.05	11.9	5.55
40345	1	0/0	Skin	/	/	/	/	0.516	-16.71	4.03	53.46	13.14	4.75
40346	1	0/0	Skin	/	/	/	/	0.37	-16.55	3.54	52.55	12.79	4.79
40347	1	0/0	Skin	/	/	/	/	0.533	-18.41	3.5	65.45	5.57	13.7
40348	1	0/0	Skin	/	/	/	/	0.546	-15.98	3.85	50.18	14.53	4.03
40349	1	0/0	Skin	/	/	/	/	0.676	-16.29	4.05	49.62	13.78	4.2
35521	2	0/0	Skin	/	/	/	/	0.781	-16.2	5.02	48.98	15.52	3.68
35522	2	0/0	Skin	/	/	/	/	0.506	-17.06	4.83	52.14	13.93	4.37
35523	2	0/0	Skin	/	/	/	/	0.67	-16.5	4.78	49.25	15.63	3.67
35524	2	0/0	Skin	/	/	/	/	0.534	-15.92	4.38	46.54	15.8	3.43
40350	2	0/0	Skin	/	/	/	/	0.468	-17.01	3.67	52.47	13.72	4.46
40351	2	0/0	Skin	/	/	/	/	0.598	-18.02	3.18	51.94	6.53	9.28
40352	2	0/0	Skin	/	/	/	/	0.481	-17.17	3.55	52.4	13.11	4.66
40353	2	0/0	Skin	/	/	/	/	0.362	-18.02	3.24	57.93	9.09	7.43
40354	2	0/0	Skin	/	/	/	/	0.458	-16.27	3.9	46.33	15.62	3.46
40355	2	0/0	Skin	/	/	/	/	0.5	-16.96	3.03	49.56	14	4.13
35525	3	0/0	Skin	/	/	/	/	0.495	-17.07	4.86	53.19	12.95	4.79
35526	3	0/0	Skin	/	/	/	/	0.589	-18.59	4.34	59.05	7.98	8.65
35527	3	0/0	Skin	/	/	/	/	0.649	-16.8	4.99	50.59	13.7	4.31
35528	3	0/0	Skin	/	/	/	/	0.414	-16.67	4.48	52.74	14.39	4.27
40356	3	0/0	Skin	/	/	/	/	0.666	-17.06	2.9	51.68	11.43	5.27
40357	3	0/0	Skin	/	/	/	/	0.345	-16.72	2.83	49.82	13.49	4.31
40358	3	0/0	Skin	/	/	/	/	0.564	-17.76	1.91	58.9	7.95	8.64
40359	3	0/0	Skin	/	/	/	/	0.535	-17.98	2.52	62.71	6.54	11.19
40360	3	0/0	Skin	/	/	/	/	0.427	-18.13	2.18	59.05	7.91	8.7
40361	3	0/0	Skin	/	/	/	/	0.595	-17	3.48	49.86	12.57	4.65
35016	1	B62/LE	Bone	221.8	147.9	58.8	39.7566	0.577	-15.52	4.53	45.69	16.51	3.23
35017	2	B62/LE	Bone	268.1	186.9	58.5	31.3002	0.574	-16.33	3.96	45.29	16.49	3.2
35018	3	B62/LE	Bone	478.1	308.1	73.4	23.8234	0.586	-16.2	4.36	45.74	16.93	3.15
