# Supplementary material for: Solubilization of skin collagen improves the accuracy and reliability of stable isotope measurements
Source: PeerJ. 2025 Oct 8;13:e20152. doi: 10.7717/peerj.20152 (PMC12514997; doi:10.7717/peerj.20152)
Supplement: Supplemental Information 5 [file peerj-13-20152-s005.xlsx]

## Sheet: Sheet1
Pig	Treatment	n	Mean (δ13CVPDB/‰)	s	Min. (δ13CVPDB/‰)	Max. (δ13CVPDB/‰)	Mean (δ15N ‰)	s	Min. (δ15N ‰)	Max. (δ15N ‰)	Mean (%C)	s	Min. (%)	Max. (%)	Mean (%N)	s	Min. (%)	Max. (%)
1	65/LE	10	–15.31	0.13	–15.48	–15.14	4.70	0.16	4.45	4.91	40.83	0.35	40.00	41.20	14.85	0.26	14.4	15.1
1	62/LE	10	–15.03	0.13	–15.97	–14.82	4.69	0.15	4.37	4.92	46.10	0.51	44.97	46.62	17.18	0.22	16.71	17.38
1	58/LE	10	–15.07	0.12	–15.97	–14.84	4.71	0.13	4.23	5.09	46.43	0.61	45.46	47.13	17.14	0.22	16.8	17.41
1	62/LE*A	5	–15.11	0.07	–16.17	–15.04	4.76	0.17	4.58	4.93	45.95	1.12	44.22	47.11	16.92	0.43	16.29	17.44
1	0/LE	10	–15.89	0.30	–16.17	–15.61	4.88	0.16	4.60	5.03	45.39	1.53	43.44	47.83	14.59	0.55	13.41	15.13
2	65/LE	10	–15.97	0.14	–16.17	–15.70	4.56	0.32	4.01	5.03	40.63	0.32	40.30	41.30	14.90	0.14	14.60	15.10
2	62/LE	10	–15.77	0.13	–16.02	–15.60	4.48	0.19	4.12	4.77	45.63	1.01	43.86	47.08	17.00	0.41	16.33	17.61
2	58/LE	10	–15.87	0.19	–16.16	–15.57	4.88	0.23	4.57	5.32	45.61	0.92	44.06	46.69	16.77	0.38	16.18	17.34
2	62/LE*A	5	–15.88	0.20	–16.08	–15.63	4.85	0.32	4.46	5.20	45.71	0.74	44.86	46.57	16.94	0.31	16.56	17.29
2	0/LE	10	–16.99	1.12	–20.12	–16.34	4.53	0.33	4.06	4.96	46.87	2.79	43.71	52.14	13.87	1.24	11.26	15.05
3	65/LE	10	–15.85	0.13	–16.04	–15.70	4.44	0.25	4.01	4.78	40.77	0.34	40.25	41.20	15.01	0.13	14.80	15.20
3	62/LE	10	–15.85	0.10	–15.97	–15.69	4.69	0.15	4.49	4.88	45.11	0.79	44.13	46.23	16.51	0.33	16.00	17.04
3	58/LE	10	–15.72	0.14	–16.00	–15.55	4.72	0.18	4.43	4.96	45.28	0.65	45.28	47.04	17.07	0.33	16.54	17.43
3	62/LE*A	5	–15.90	0.26	–16.19	–15.56	4.40	0.22	4.20	4.72	46.33	1.02	45.34	47.91	16.92	0.64	15.49	17.10
3	0/LE	10	–16.62	0.40	–17.44	–16.20	4.60	0.20	4.38	5.01	47.54	3.88	42.77	54.60	13.57	1.67	10.15	15.02
