# Supplementary material for: Solubilization of skin collagen improves the accuracy and reliability of stable isotope measurements
Source: PeerJ. 2025 Oct 8;13:e20152. doi: 10.7717/peerj.20152 (PMC12514997; doi:10.7717/peerj.20152)
Supplement: Supplemental Information 6 [file peerj-13-20152-s006.xlsx]

## Sheet: Sheet1
δ13C		65/LE		62/LE		58/LE		62/LE/*A
Pig	Treatment	z	p	z	p	z	p	z	p
1	62/LE	2.84	0.005
1	58/LE	2.44	0.01	0.4	0.7
1	62/LE*A	1.75	0.08	0.6	0.6	0.3	0.8
1	0/LE	2.02	0.04	4.9	1.209e-06	4.5	8.107e-06	3.4	0.0007
2	62/LE	2.02	0.04
2	58/LE	1.04	0.3	0.98	0.33
2	62/LE*A	0.7	0.5	0.99	0.32	0.2	0.85
2	0/LE	2.8	0.004	4.7	1.159e-06	3.9	0.0001	2.98	0.003
3	62/LE	0.07	0.95
3	58/LE	1.6	0.12	1.63	0.1
3	62/LE*A	0.21	0.83	0.2	0.9	1.5	0.14
3	0/LE	3.44	0.0006	3.40	0.0007	5.01	5.494e-07	2.6	0.009
