# Supplementary material for: Solubilization of skin collagen improves the accuracy and reliability of stable isotope measurements
Source: PeerJ. 2025 Oct 8;13:e20152. doi: 10.7717/peerj.20152 (PMC12514997; doi:10.7717/peerj.20152)
Supplement: Supplemental Information 7 [file peerj-13-20152-s007.xlsx]

## Sheet: Sheet1
δ15N		65/LE		62/LE		58/LE		62/LE/*A
Pig	Treatment	z	p	z	p	z	p	z	p
2	62/LE	0.84	0.39
2	58/LE	2.19	0.03	3.031	0.002
2	62/LE*A	1.43	0.15	2.12	0.034	0.35	0.72
2	0/LE	0.15	0.88	0.69	0.49	2.34	0.019	1.56	0.12
3	62/LE	2.25	0.025
3	58/LE	2.52	0.012	0.27	0.78
3	62/LE*A	0.47	0.64	2.3	0.021	2.52	0.012
3	0/LE	0.99	0.32	1.25	0.21	1.52	0.13	1.28	0.2
