# Supplementary material for: Solubilization of skin collagen improves the accuracy and reliability of stable isotope measurements
Source: PeerJ. 2025 Oct 8;13:e20152. doi: 10.7717/peerj.20152 (PMC12514997; doi:10.7717/peerj.20152)
Supplement: Supplemental Information 8 [file peerj-13-20152-s008.xlsx]

## Sheet: Sheet1
Treatment	n	Mean	s	Min.	Max.
65/LE	30	3.18	0.04	3.14	3.25
62/LE	30	3.15	0.06	3.11	3.37
58/LE	30	3.17	0.03	3.13	3.26
62/LE*A	15	3.22	0.13	3.14	3.52
0/LE	30	3.94	0.71	3.34	6.27
