# Supplementary material for: Solubilization of skin collagen improves the accuracy and reliability of stable isotope measurements
Source: PeerJ. 2025 Oct 8;13:e20152. doi: 10.7717/peerj.20152 (PMC12514997; doi:10.7717/peerj.20152)
Supplement: Supplemental Information 9 [file peerj-13-20152-s009.xlsx]

## Sheet: Sheet1
C:Natomic	65/LE		62/LE		58/LE		62/LE/*A
Treatment	z	p	z	p	z	p	z	p
62/LE	4.17	3.016E-05
58/LE	1.37	0.17	2.8	0.005
62/LE*A	0.26	0.8	3.15	0.002	0.86	0.39
0/LE	4.99	6.137E-07	9.16	5.231e-20	6.36	2.025e-10	4.33	1.501e-05
