# Supplementary material for: Solubilization of skin collagen improves the accuracy and reliability of stable isotope measurements
Source: PeerJ. 2025 Oct 8;13:e20152. doi: 10.7717/peerj.20152 (PMC12514997; doi:10.7717/peerj.20152)
Supplement: Supplemental Information 10 [file peerj-13-20152-s010.xlsx]

## Sheet: Sheet1
wt% C	65/LE		62/LE		58/LE		62/LE/*A
Treatment	z	p	z	p	z	p	z	p
62/LE	5.8	6.645e-09
58/LE	7.25	4.105e-13	1.45	0.15
62/LE*A	5.58	2.345e-08	0.85	0.39	0.37	0.74
0/LE	6.92	4.403e-12	1.12	0.26	0.33	0.74	0.069	0.95
