# Supplementary material for: Solubilization of skin collagen improves the accuracy and reliability of stable isotope measurements
Source: PeerJ. 2025 Oct 8;13:e20152. doi: 10.7717/peerj.20152 (PMC12514997; doi:10.7717/peerj.20152)
Supplement: Supplemental Information 11 [file peerj-13-20152-s011.xlsx]

## Sheet: Sheet1
wt% N	65/LE		62/LE		58/LE		62/LE/*A
Treatment	z	p	z	p	z	p	z	p
62/LE	5.81	6.308e-09
58/LE	6.25	4.173e-10	0.44	0.66
62/LE*A	4.11	4.019e-05	0.64	0.52	0.99	0.32
0/LE	1.71	0.087	7.52	5.408e-14	7.96	1.71e-15	5.51	3.685e-08
