# Supplementary material for: Solubilization of skin collagen improves the accuracy and reliability of stable isotope measurements
Source: PeerJ. 2025 Oct 8;13:e20152. doi: 10.7717/peerj.20152 (PMC12514997; doi:10.7717/peerj.20152)
Supplement: Supplemental Information 12 [file peerj-13-20152-s012.xlsx]

## Sheet: Sheet1
Treatment	δ13C	δ15N
65/LE	0.133734	0.249499
62/LE	0.119252	0.161972
58/LE	0.150815	0.150815
62/LE*A	0.191024	0.242675
0/LE	0.709116	0.24241
