# Supplementary material for: Solubilization of skin collagen improves the accuracy and reliability of stable isotope measurements
Source: PeerJ. 2025 Oct 8;13:e20152. doi: 10.7717/peerj.20152 (PMC12514997; doi:10.7717/peerj.20152)
Supplement: Supplemental Information 13 [file peerj-13-20152-s013.xlsx]

## Sheet: Sheet1
All Treatments	Refluxed Collagen		Insoluble Residue		Wilcoxon
Variable	Mean	s	Mean	s	z	p	r
δ13C	-15.61	0.38	-17.52	0.64	-8.9	5.8322e-19	0.61
δ15N	4.65	0.25	4.24	0.42	-7.76	8.4778e-15	-0.53
wt% C	44.42	2.46	53.29	4.36	-8.86	8.354e-19	0.61
wt% N	16.33	0.98	12.08	2.91	-8.89	6.3589e-19	-0.61
C:NAtomic	3.17	0.06	5.67	2.40	-8.9	5.833e-19	-0.61
