# Supplementary material for: Solubilization of skin collagen improves the accuracy and reliability of stable isotope measurements
Source: PeerJ. 2025 Oct 8;13:e20152. doi: 10.7717/peerj.20152 (PMC12514997; doi:10.7717/peerj.20152)
Supplement: Supplemental Information 14 [file peerj-13-20152-s014.xlsx]

## Sheet: Sheet1
Sample ID	Pig	Treatment	initial mass (mg)	post lipid xtract mass (mg)	collagen mass (mg)	% collagen
26769	1	65/LE	56.4	38.1	26.8	70.3412
26770	1	65/LE	48.5	34.9	23.4	67.0487
26771	1	65/LE	47.8	32.1	24.1	75.0779
26772	1	65/LE	47.5	33.4	24.5	73.3533
26773	1	65/LE	45.3	32.6	23.6	72.3926
26786	1	65/LE	72.4	51.5	33.6	65.2427
26787	1	65/LE	124.5	71.2	42	58.9888
26788	1	65/LE	114.6	67.2	38.8	57.7381
26789	1	65/LE	91.4	69.8	38.8	55.5874
26790	1	65/LE	89.2	66.2	36.5	55.136
26774	2	65/LE	132.8	102.9	46.4	45.0923
26775	2	65/LE	154.2	105.6	41	38.8258
26776	2	65/LE	131.8	95.4	32.8	34.3816
26777	2	65/LE	116.4	76.2	35.6	46.7192
26778	2	65/LE	172.7	115.6	31.7	27.4221
26791	2	65/LE	131	86.5	35.8	41.3873
26792	2	65/LE	201.4	120.2	49.9	41.5141
26793	2	65/LE	164.4	94.3	42.9	45.4931
26794	2	65/LE	161.6	110.3	32.5	29.4651
26795	2	65/LE	203.9	131.3	40.1	30.5407
26779	3	65/LE	152.9	95.7	54.3	56.7398
26780	3	65/LE	120.2	71.7	41.9	58.4379
26781	3	65/LE	129.7	87.4	48	54.9199
26782	3	65/LE	104.5	69.6	35.2	50.5747
26783	3	65/LE	164.9	100.7	46	45.6802
26796	3	65/LE	172	96.2	45.9	47.7131
26797	3	65/LE	208.9	130.7	39.1	29.9158
26798	3	65/LE	184.1	115.1	44.3	38.4883
26799	3	65/LE	131.8	91.1	45.9	50.3842
26800	3	65/LE	121.2	70.2	38.4	54.7009
34986	1	62/LE	145.3	74.6	37.4	50.134
34987	1	62/LE	243.9	102.4	40.9	39.9414
34988	1	62/LE	175	92.3	41.4	44.8537
34989	1	62/LE	214.6	108.7	45.4	41.7663
34990	1	62/LE	352.5	144.9	55.8	38.5093
34991	1	62/LE	262.5	124.9	53	42.4339
34992	1	62/LE	175.5	92	48.5	52.7174
34993	1	62/LE	181.2	104.8	48.5	46.2786
34994	1	62/LE	216.6	115.4	47.5	41.1612
34995	1	62/LE	226.8	99.4	44.5	44.7686
34996	2	62/LE	273.2	97.6	51.2	52.459
34997	2	62/LE	355.2	107.3	48.4	45.1072
34998	2	62/LE	352	107.7	46.2	42.8969
34999	2	62/LE	284.1	94.9	42.4	44.6786
35000	2	62/LE	308.4	108.4	46.2	42.6199
35001	2	62/LE	132.6	56.6	35.9	63.4276
35002	2	62/LE	283.8	80.9	44.4	54.8826
35003	2	62/LE	226.3	92.9	41.1	44.2411
35004	2	62/LE	119.1	49.6	30.8	62.0968
35005	2	62/LE	364.9	136	51.6	37.9412
35006	3	62/LE	166.3	97.3	42.4	43.5766
35007	3	62/LE	231.2	132.4	50.8	38.3686
35008	3	62/LE	117.9	56.1	36.2	64.5276
35009	3	62/LE	110.7	56.9	36.8	64.6749
35010	3	62/LE	158.9	98.7	46.5	47.1125
35011	3	62/LE	112.2	66.7	41	61.4693
35012	3	62/LE	143.3	87.1	44.7	51.3203
35013	3	62/LE	183.2	94.2	44.9	47.6645
35014	3	62/LE	146.7	75.5	40.8	54.0397
35015	3	62/LE	210.4	134.1	49.5	36.9128
35878	1	58/LE	95.7	66	30.7	46.5152
35879	1	58/LE	153.6	55.5	31.1	56.036
35880	1	58/LE	229.5	84.9	40.6	47.821
35881	1	58/LE	110.2	58.4	32.6	55.8219
35882	1	58/LE	161.4	96.7	35.5	36.7115
35883	1	58/LE	131.8	82.8	36.4	43.9614
35884	1	58/LE	195.7	65.6	34	51.8293
35885	1	58/LE	168.9	90.5	33.1	36.5746
35886	1	58/LE	168.6	76.8	36.9	48.0469
35887	1	58/LE	230.9	102	33	32.3529
35893	2	58/LE	187.3	101	22.6	22.3762
35894	2	58/LE	210.7	86.2	35.8	41.5313
35895	2	58/LE	219.5	138.9	28.3	20.3744
35896	2	58/LE	229.1	147.5	34.9	23.661
35897	2	58/LE	48.9	25.4	17.6	69.2913
35898	2	58/LE	216.2	144.8	37.7	26.0359
35899	2	58/LE	302.5	184	49.6	26.9565
35900	2	58/LE	183.4	119.5	31.6	26.4435
35901	2	58/LE	173.3	119.2	39.4	33.0537
35902	2	58/LE	192.5	125.6	23.9	19.0287
35908	3	58/LE	173.3	63.9	33.9	53.0516
35909	3	58/LE	197.6	81.2	39.1	48.1527
35910	3	58/LE	160.6	68.6	34.3	50
35911	3	58/LE	126.5	50.6	31.9	63.0435
35912	3	58/LE	146.1	66.4	35.2	53.012
35913	3	58/LE	175.3	78.7	41.4	52.6048
35914	3	58/LE	143.2	59.7	35.2	58.9615
35915	3	58/LE	179.8	66.2	35.3	53.3233
35916	3	58/LE	89.6	38.4	27.8	72.3958
35917	3	58/LE	86.7	32	22.6	70.625
35888	1	62/LE*A	102.9	66.8	27.5	41.1677
35889	1	62/LE*A	216.9	89.5	29.8	33.2961
35890	1	62/LE*A	212	110.1	32.3	29.337
35891	1	62/LE*A	255.3	170.6	37	21.6882
35892	1	62/LE*A	130.1	65.4	31.1	47.5535
35903	2	62/LE*A	141.5	89.3	22.6	25.308
35904	2	62/LE*A	118.3	79.7	32.1	40.276
35905	2	62/LE*A	186.6	119.3	31.3	26.2364
35906	2	62/LE*A	182	109.5	31.6	28.8584
35907	2	62/LE*A	93.2	59.9	27.9	46.5776
35918	3	62/LE*A	93.1	39.1	23.3	59.5908
35919	3	62/LE*A	156.1	56.6	33.4	59.0106
35920	3	62/LE*A	171.7	59.1	33.9	57.3604
35921	3	62/LE*A	113.1	37.2	23.7	63.7097
35922	3	62/LE*A	171.3	92.3	34.9	37.8115
35016	1	B62/LE	221.8	147.9	58.8	39.7566
35017	2	B62/LE	268.1	186.9	58.5	31.3002
35018	3	B62/LE	478.1	308.1	73.4	23.8234
